# Supplementary material for: Scalable Preparation of Cellulose Nanofibers from Office Waste Paper by an Environment-Friendly Method
Source: MDPI journal article supplement (doi:10.3390/polym13183119), 2021-09-15
Supplement: s1 [file s1]

# Scalable preparation of cellulose nanofibers from office waste paper by an environment-friendly method

**Deyuan Huang<sup>a</sup>, Haoqun Hong<sup>a</sup>, Weilong Huang<sup>a</sup>, Haiyan Zhang<sup>a</sup>, Xiaobin Hong<sup>b\*</sup>**

<sup>a</sup> School of Materials and Energy, Guangdong University of Technology, Guangzhou 510006, China.

<sup>b</sup> School of Mechanical and Automotive Engineering, South China University of Technology, Guangzhou 510640, China.

**Supporting Information**

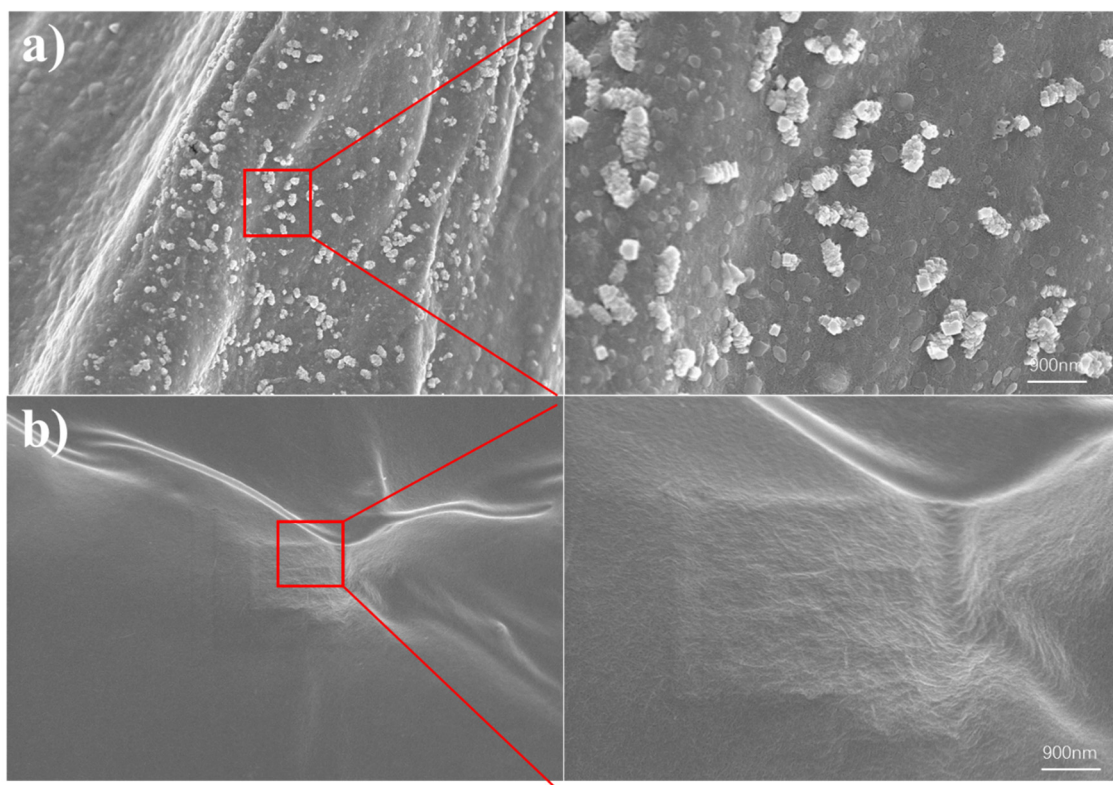

**Figure S1.** SEM images of CNF. (a)WCNF1, (b)WCNF2

It is obvious that irregular small particles are distributed on the surface of WCNF1, in contrast, the surface of WCNF2 is very smooth in Figure S1.

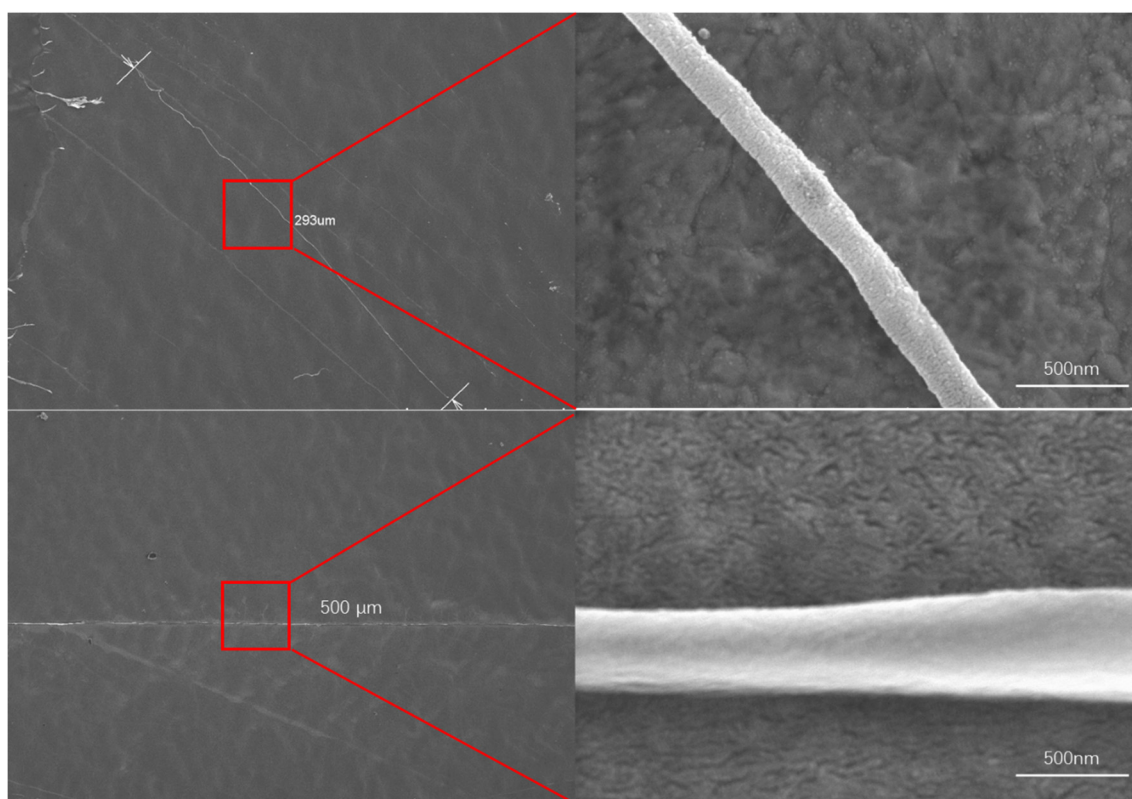

**Figure S2.** SEM images of BCNF1.

A rough calculation shows that the aspect ratio of BCNF1 is in the range of 1000-1465, indicating that it is possible to prepare CNF with a high aspect ratio by the combination of acid treatment and bleaching treatment.

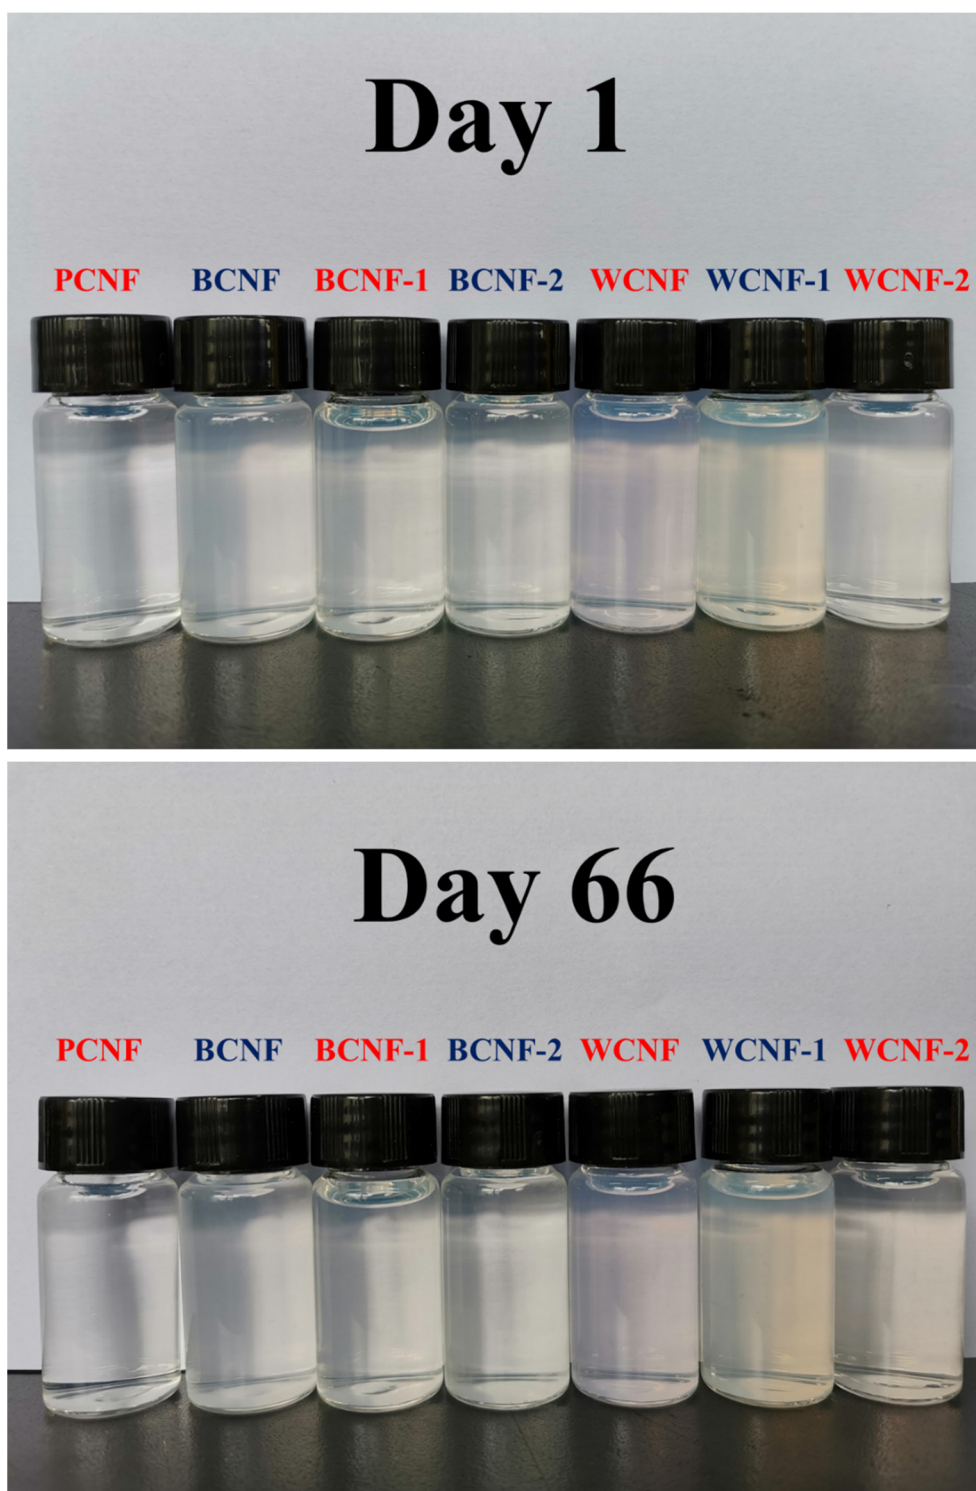

**Figure S3.** The CNF solutions was placed for 1 day and 66 days.

The CNF solution produced no precipitate after 66 days and showed no significant general change, indicating that the TEMPO-oxidised CNF remained well stabilised at room temperature.

**Table S1.** Different pretreatment methods and preparation of nanocellulose for office waste paper.

| Source           | Pretreatment                                                | Type | Fabrication method                                     | Ref. |
|------------------|-------------------------------------------------------------|------|--------------------------------------------------------|------|
| newspaper        | alkali pretreatment (NaOH)                                  | CNC  | 60 wt% H <sub>2</sub> SO <sub>4</sub> at 45 °C, 90 min | [11] |
|                  | bleaching treatment (NaClO)                                 |      |                                                        |      |
| paper residue    | alkali pretreatment (NaOH)                                  | CNC  | 40 wt% H <sub>2</sub> SO <sub>4</sub> at 50 °C, 60 min | [12] |
|                  | acid pretreatment (H <sub>2</sub> SO <sub>4</sub> )         |      |                                                        |      |
|                  | bleaching treatments (H <sub>2</sub> O <sub>2</sub> + NaOH) |      |                                                        |      |
| waste paper      | pulping and flotation pretreatment                          | CNF  | ultrafine ground                                       | [13] |
|                  | alkali pretreatment (NaOH)                                  |      |                                                        |      |
|                  | bleaching treatment (H <sub>2</sub> O <sub>2</sub> + NaOH)  |      |                                                        |      |
| newspapers       | ——                                                          | CNF  | ultrafine ground                                       | [14] |
| <sup>a</sup> OWP | bleaching treatment (H <sub>2</sub> O <sub>2</sub> + NaOH)  | CNC  | 64 wt% H <sub>2</sub> SO <sub>4</sub> at 45 °C, 60 min | [38] |
|                  | deinking pretreatment                                       |      |                                                        |      |

|                  |                                                                                  |     |                                                         |      |
|------------------|----------------------------------------------------------------------------------|-----|---------------------------------------------------------|------|
| OWP              | deinking pretreatment                                                            | CNC | 59 wt% H <sub>2</sub> SO <sub>4</sub> at 45 °C, 60 min  | [39] |
| <sup>b</sup> WTP | ——                                                                               | CNC | 47 wt% H <sub>2</sub> SO <sub>4</sub> at 60 °C, 120 min | [15] |
| OWP              | alkali pretreatment (NaOH)                                                       | CNC | 64 wt% H <sub>2</sub> SO <sub>4</sub> at 45 °C, 30 min  | [16] |
| <sup>c</sup> WPP | deinking process (chloroform + dimethyl sulfoxide)<br>alkali pretreatment (NaOH) | CNC | 64 wt% H <sub>2</sub> SO <sub>4</sub> at 45 °C, 60 min  | [17] |
| OWP              | ——                                                                               | CNF | mechanical fibrillation                                 | [18] |

a: OWP is office waste paper;

b: WTP is waste tissue paper;

c: WPP is waste printing paper
